# Supplementary material
Source: PubMed Central journal article supplement (PMC4848178)
Supplement: NIHMS742213-supplement-Supplementary_Information_Tables.pdf [file NIHMS742213-supplement-Supplementary_Information_Tables.pdf]

**Supplementary Table 1.** Adjusted mean fat mass (kg) by ADP and difference between sexes by race

|                  | Females<br>(n=174) | Males<br>(n=170) | Difference     | p-value |
|------------------|--------------------|------------------|----------------|---------|
| Caucasian        | 0.477 ± 0.014      | 0.391 ± 0.015    | -0.087 ± 0.017 | 0.0001  |
| African-American | 0.533 ± 0.027      | 0.449 ± 0.027    | -0.084 ± 0.036 | 0.0205  |
| Hispanic         | 0.488 ± 0.023      | 0.499 ± 0.020    | 0.011 ± 0.028  | 0.7019  |
| Asian            | 0.495 ± 0.031      | 0.465 ± 0.034    | -0.030 ± 0.044 | 0.5055  |

Values are LS mean±SEE.

**Supplementary Table 2:** Adjusted mean sum of skinfolds (mm) by race and sex and between races for females and males combined

| <b>By race and sex</b>                              |                            |                                       |                |
|-----------------------------------------------------|----------------------------|---------------------------------------|----------------|
| <b>Race</b>                                         | <b>Females<sup>1</sup></b> | <b>Males<sup>1</sup></b>              |                |
| Caucasian                                           | 10.9 ± 0.2                 | 10.5 ± 0.2                            |                |
| African-American                                    | 11.5 ± 0.4                 | 11.4 ± 0.4                            |                |
| Hispanic                                            | 11.0 ± 0.4                 | 11.2 ± 0.3                            |                |
| Asian                                               | 11.1 ± 0.5                 | 10.8 ± 0.5                            |                |
| <b>Between races for females and males combined</b> |                            |                                       |                |
| <b>Race (i)</b>                                     | <b>Race (j)</b>            | <b>Difference (i - j)<sup>2</sup></b> | <b>p-value</b> |
| African-American                                    | Caucasian                  | 0.777 ± 0.323                         | 0.0169         |
| Hispanic                                            | Caucasian                  | 0.439 ± 0.262                         | 0.0954         |
| Asian                                               | Caucasian                  | 0.236 ± 0.368                         | 0.5217         |
| Hispanic                                            | African-American           | -0.338 ± 0.352                        | 0.3372         |
| Asian                                               | African-American           | -0.541 ± 0.455                        | 0.2362         |
| Asian                                               | Hispanic                   | -0.203 ± 0.410                        | 0.6211         |

<sup>1</sup>Values are mean ±SEE; <sup>2</sup>Values are LS mean±SEE.
